# Supplementary material for: Identification of miR-29c and its Target FBXO31 as a Key Regulatory Mechanism in Esophageal Cancer Chemoresistance: Functional Validation and Clinical Significance
Source: PubMed Central journal article supplement — Theranostics. 2019 Feb 28;9(6):1599–613. doi: 10.7150/thno.30372 (PMC6485198; doi:10.7150/thno.30372), 2019-02-28
Supplement: thnov09p1599s1.pdf [file thnov09p1599s1.pdf]

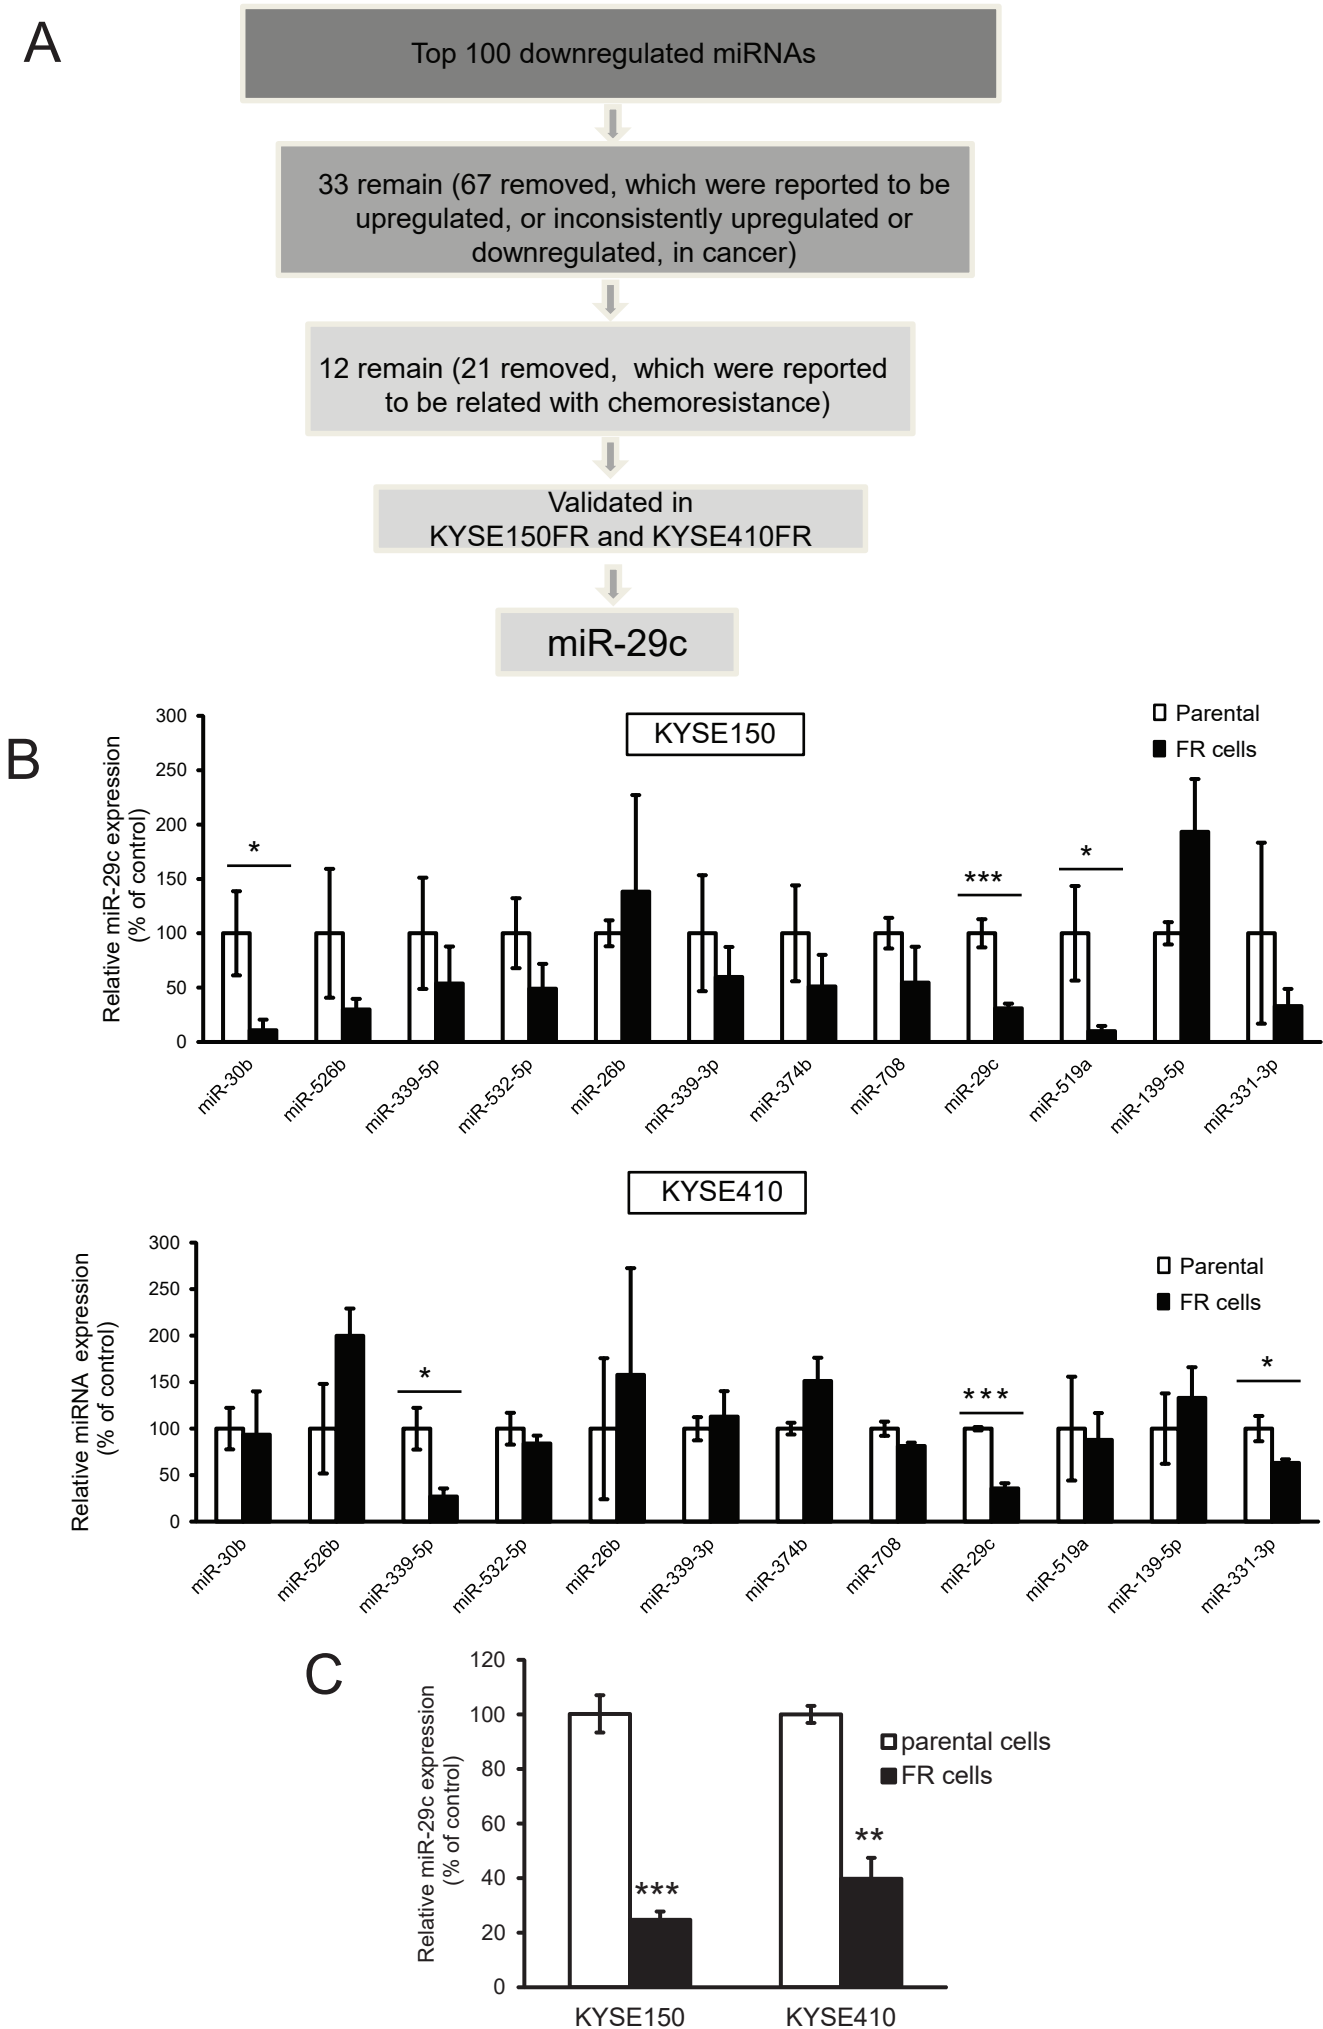

**Figure S1.** Downregulation of miR-29c in 5-FU-chemoresistant ESCC cell lines. **(A)** Diagram showing the approach used to screen and identify potential miRNAs related to 5-FU chemoresistance. **(B)** SYBR green RT-PCR analysis of 12 shortlisted miRNAs in two 5-FU-chemoresistant (FR) cell lines in comparison with the parental cell lines. **(C)** Expression level of miR-29c was robustly downregulated in both FR cell lines as determined by Taqman RT-PCR. Bars, SD; \*,  $P < 0.05$ ; \*\*,  $P < 0.01$ ; \*\*\*,  $P < 0.001$  compared with parental cells.

**A**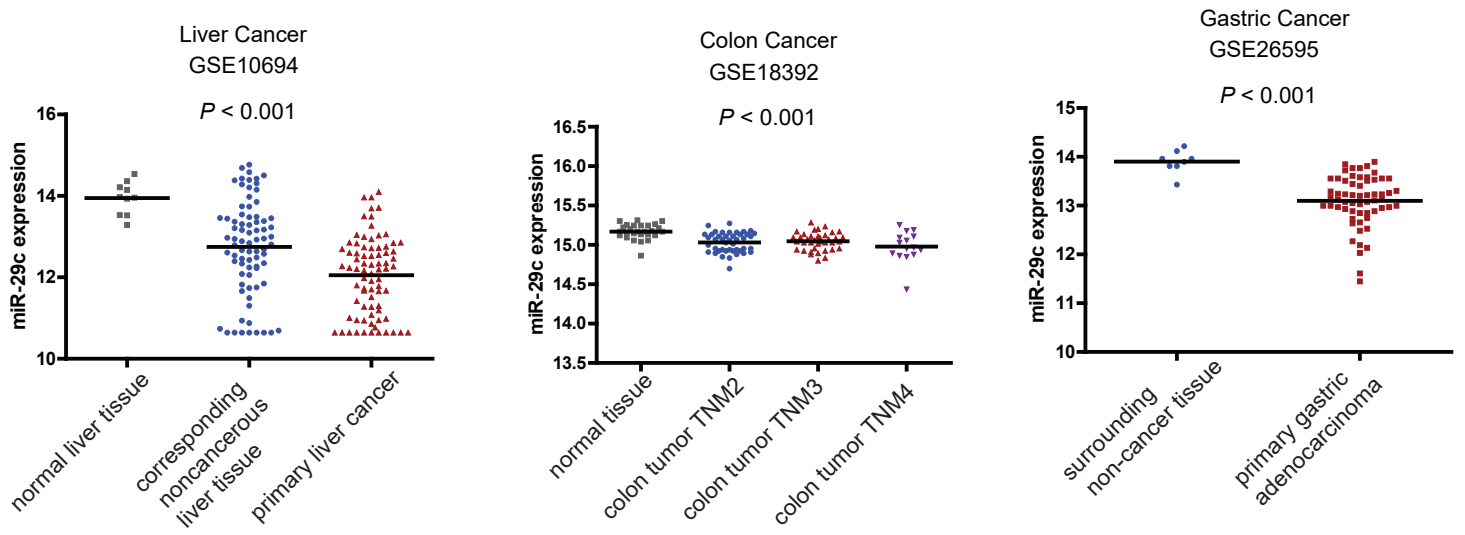**B**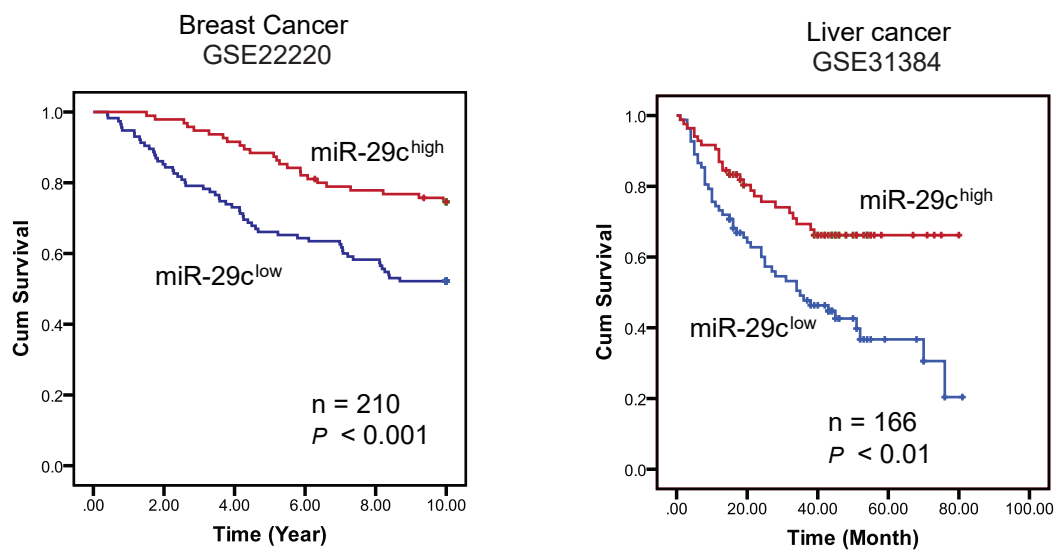

**Figure S2. (A)** Frequent downregulation of miR-29c in tumor tissues, compared with non-tumor tissues, was found in multiple cancer types in Gene Expression Omnibus (GEO) databases, including GSE10694, GSE18392 and GSE26595. **(B)** Kaplan-Meier analysis showing that miR-29c expression is associated with overall survival in breast and liver cancers.

**A**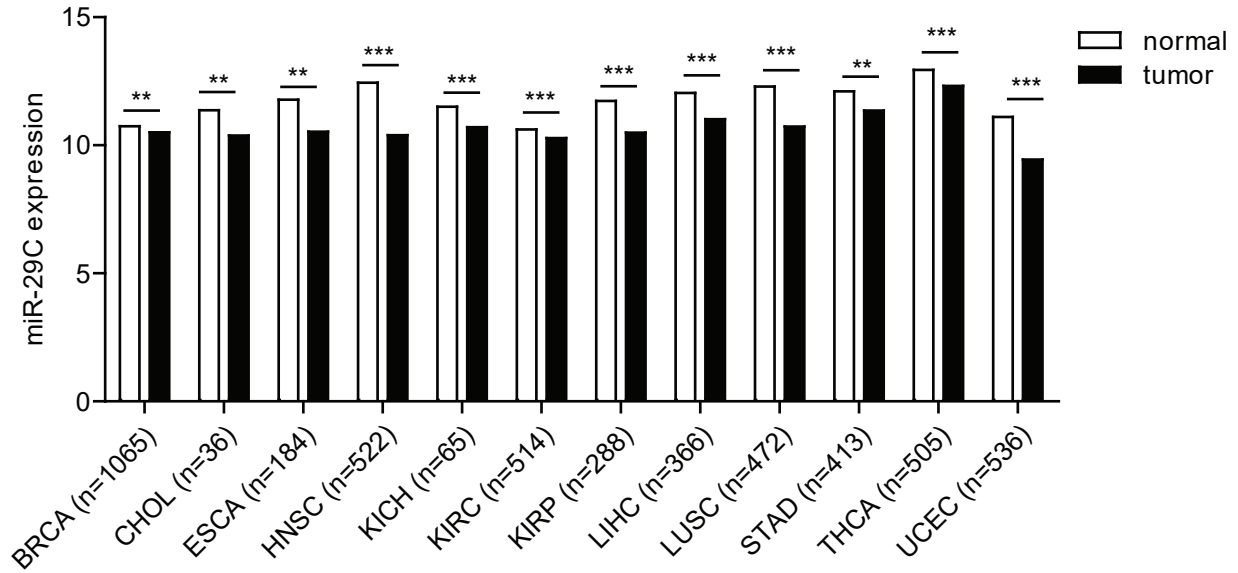**B**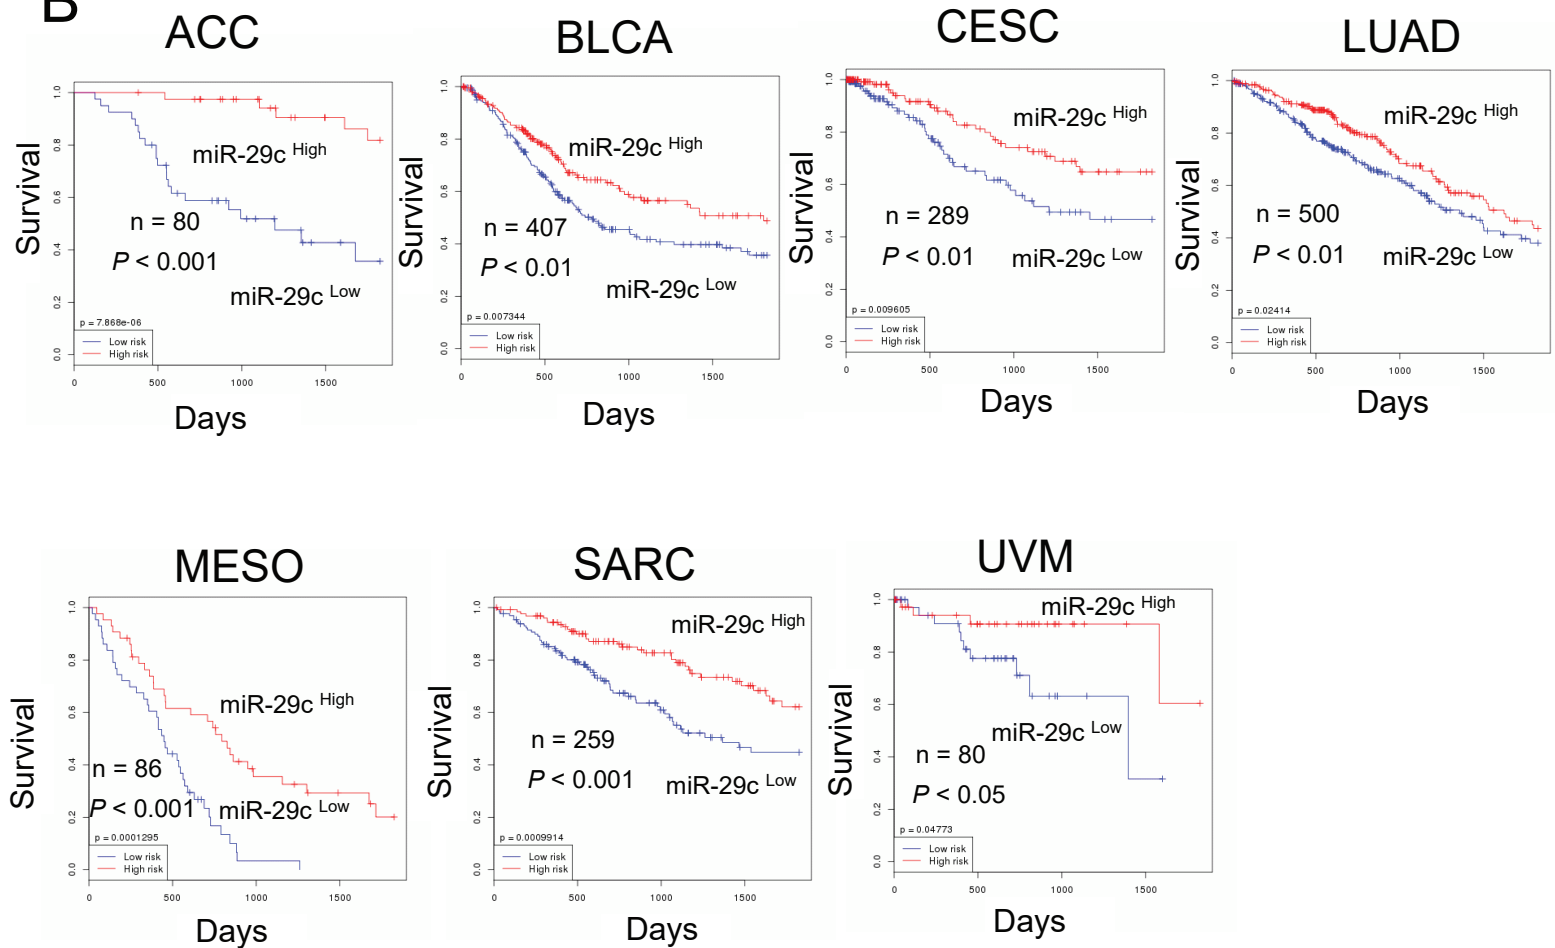

**Figure S3. (A)** The miR-29c expression in different cancer types in TCGA databases is downregulation in tumor tissues compared with normal tissues. BRCA: breast invasive carcinoma; CHOL: cholangiocarcinoma; ESCA: esophageal carcinoma; HNSC: head and neck squamous cell carcinoma; KICH: kidney chromophobe; KIRC: kidney renal clear cell carcinoma; KIRP: kidney renal papillary cell carcinoma; LIHC: liver hepatocellular carcinoma; LUSC: lung squamous cell carcinoma; STAD: stomach adenocarcinoma; THCA: thyroid carcinoma; UCEC: uterine corpus endometrial carcinoma. \*\*,  $P < 0.01$ ; \*\*\*,  $P < 0.001$ . **(B)** Kaplan-Meier analysis showing that miR-29c is significantly associated with patient survival in different cancer types in TCGA database. ACC: adrenocortical carcinoma; BLCA: bladder urothelial carcinoma; CESC: cervical squamous cell carcinoma and endocervical adenocarcinoma; LUAD: lung adenocarcinoma; MESO: mesothelioma; SARC: sarcoma; UVM: uveal melanoma

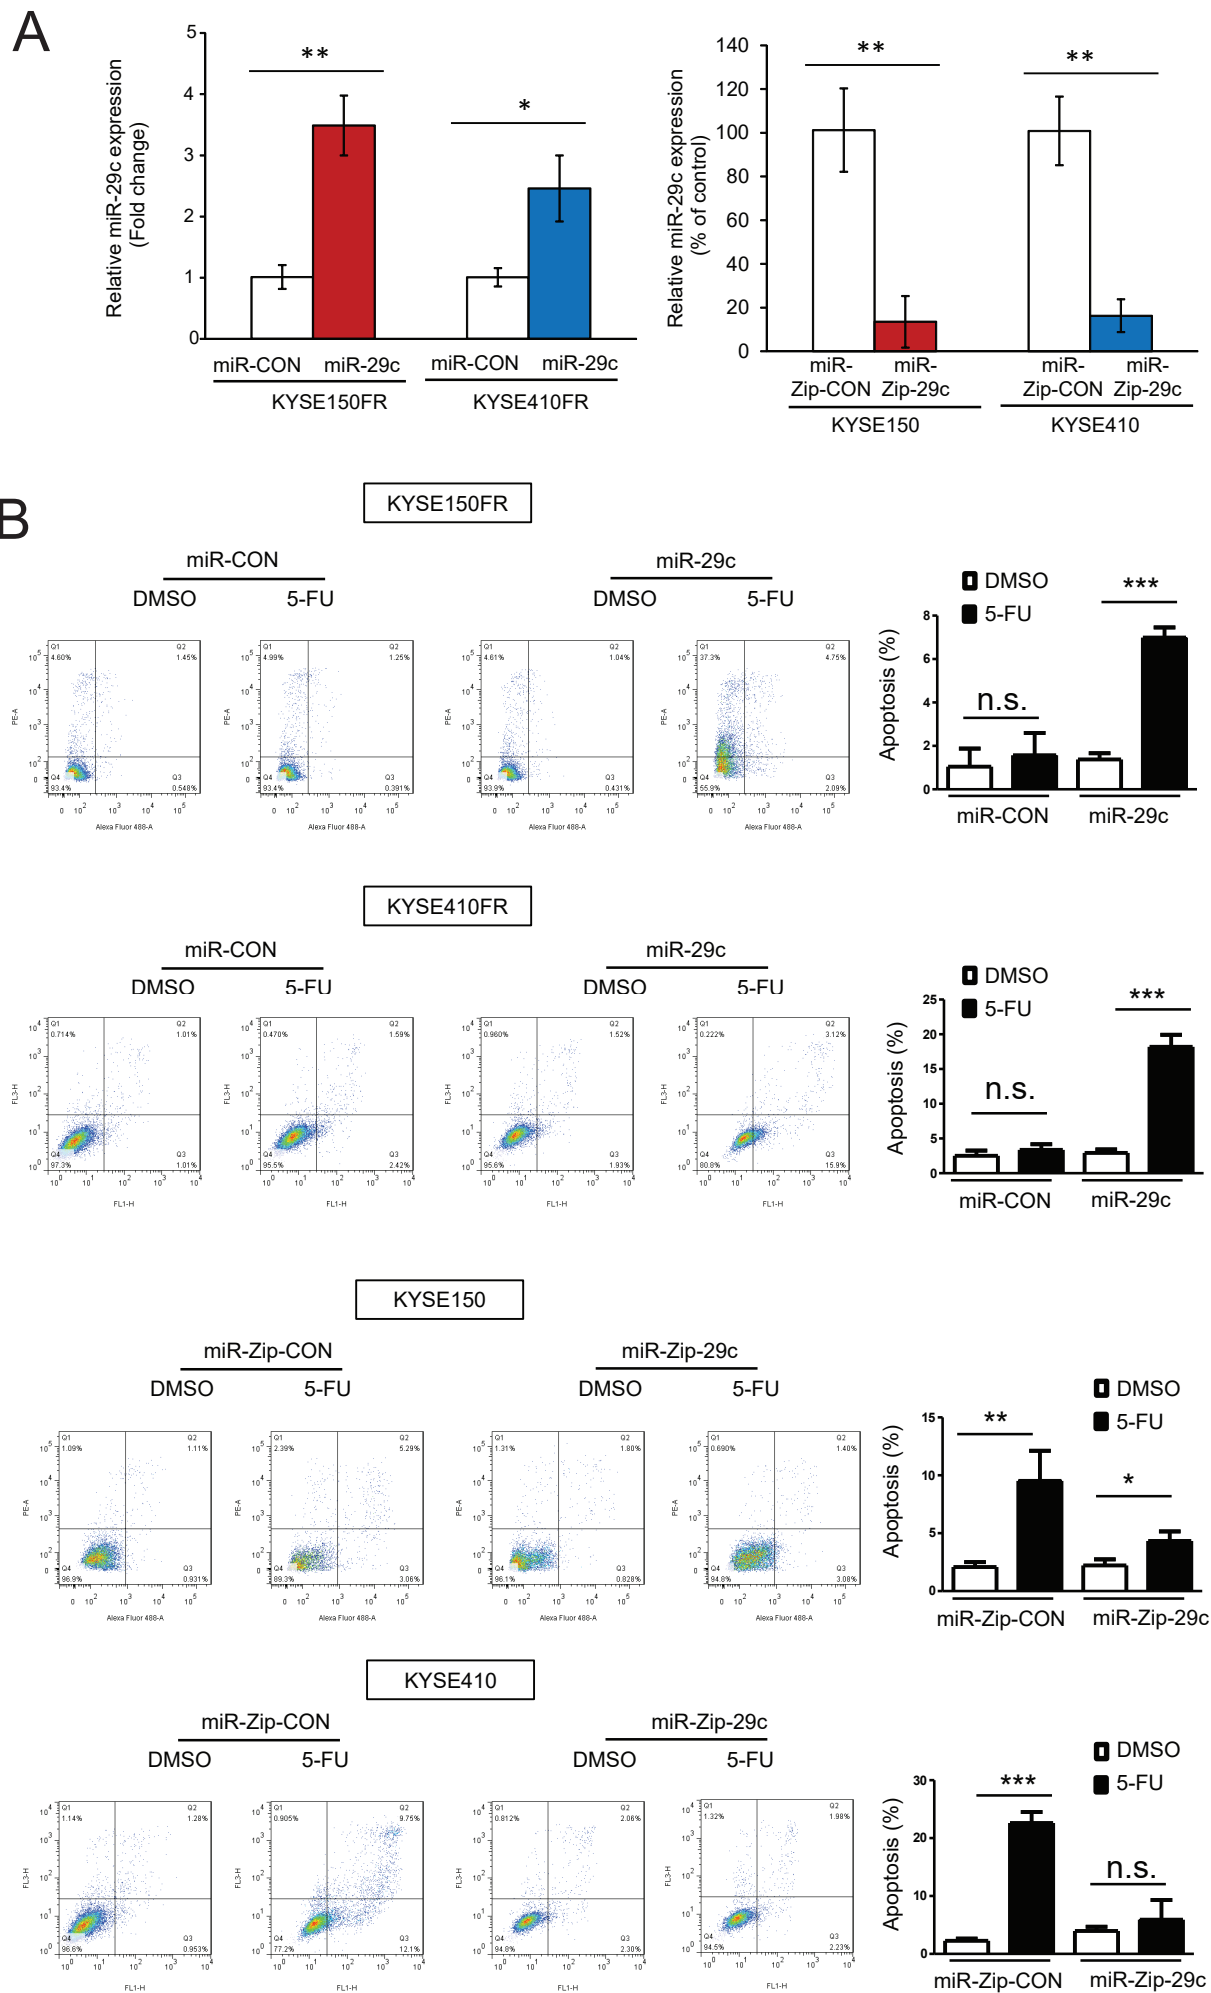

**Figure S4.** (A) KYSE150FR and KYSE410FR cells with stable overexpression of miR-29c, co-overexpression of miR-29c and FBXO31, or vector control, were treated with 5FU (20  $\mu$ M) or DMSO for 48 hours and then subjected to MTT assay. (B) Effect of manipulation of miR-29c on cell apoptosis. Bars, SD; n.s., no significance; \*,  $P < 0.05$ ; \*\*,  $P < 0.01$ ; \*\*\*,  $P < 0.001$ .



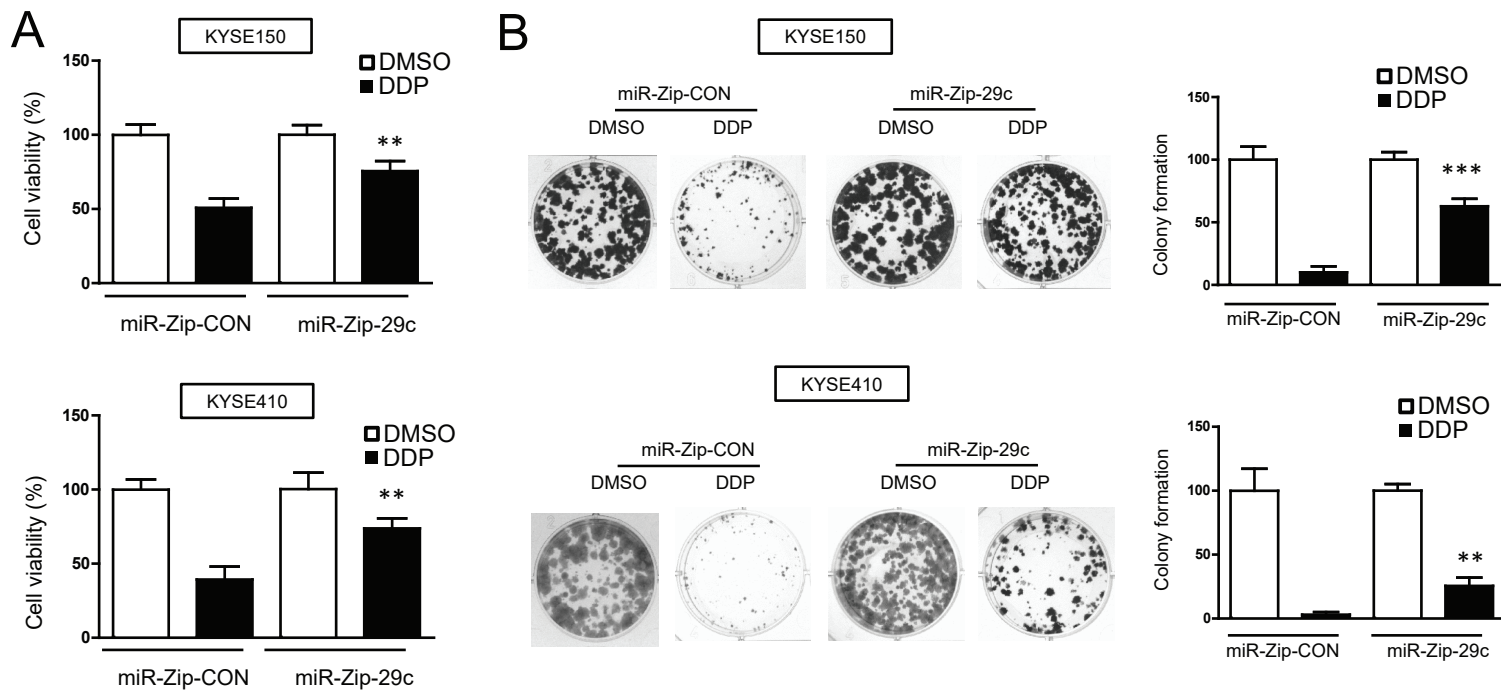

**Figure S5.** miR-29c expression sensitizes ESCC cells to DDP treatment. **(A)** ESCC cells with miR-29c-knockdown and the control cells expressing miR-zip-CON were exposed to DDP for 48 hours, and cell viability was determined by MTT assay. **(B)** Colony formation assay showing the effect of miR-29c knockdown on the sensitivity of ESCC cells to DDP. Bars, SD; \*,  $P < 0.05$ ; \*\*,  $P < 0.01$ ; \*\*\*,  $P < 0.001$ , compared with corresponding DDP-treated control cells.

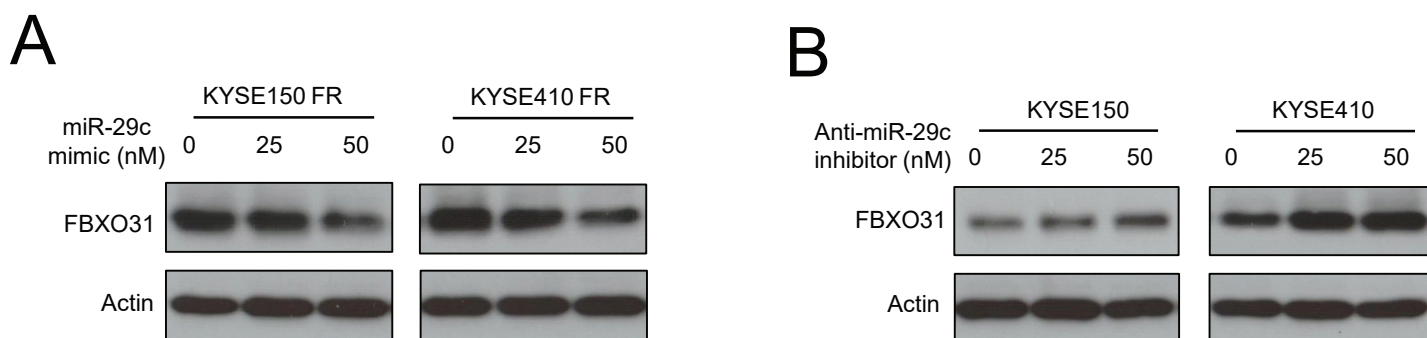

**Figure S6.** Negative regulation of FBXO31 by miR-29c in ESCC cells. **(A)** KYSE150FR and KYSE410FR cells were transfected with different doses of miR-29c mimic (up to 50 nM) for 48 h. Western blot showed that transient transfection of miR-29c resulted in decrease of FBXO31. **(B)** Western blot analyses of FBXO31 expression in ESCC cells transfected with different doses of miR-29c inhibitor (up to 50 nM) for 48 h.

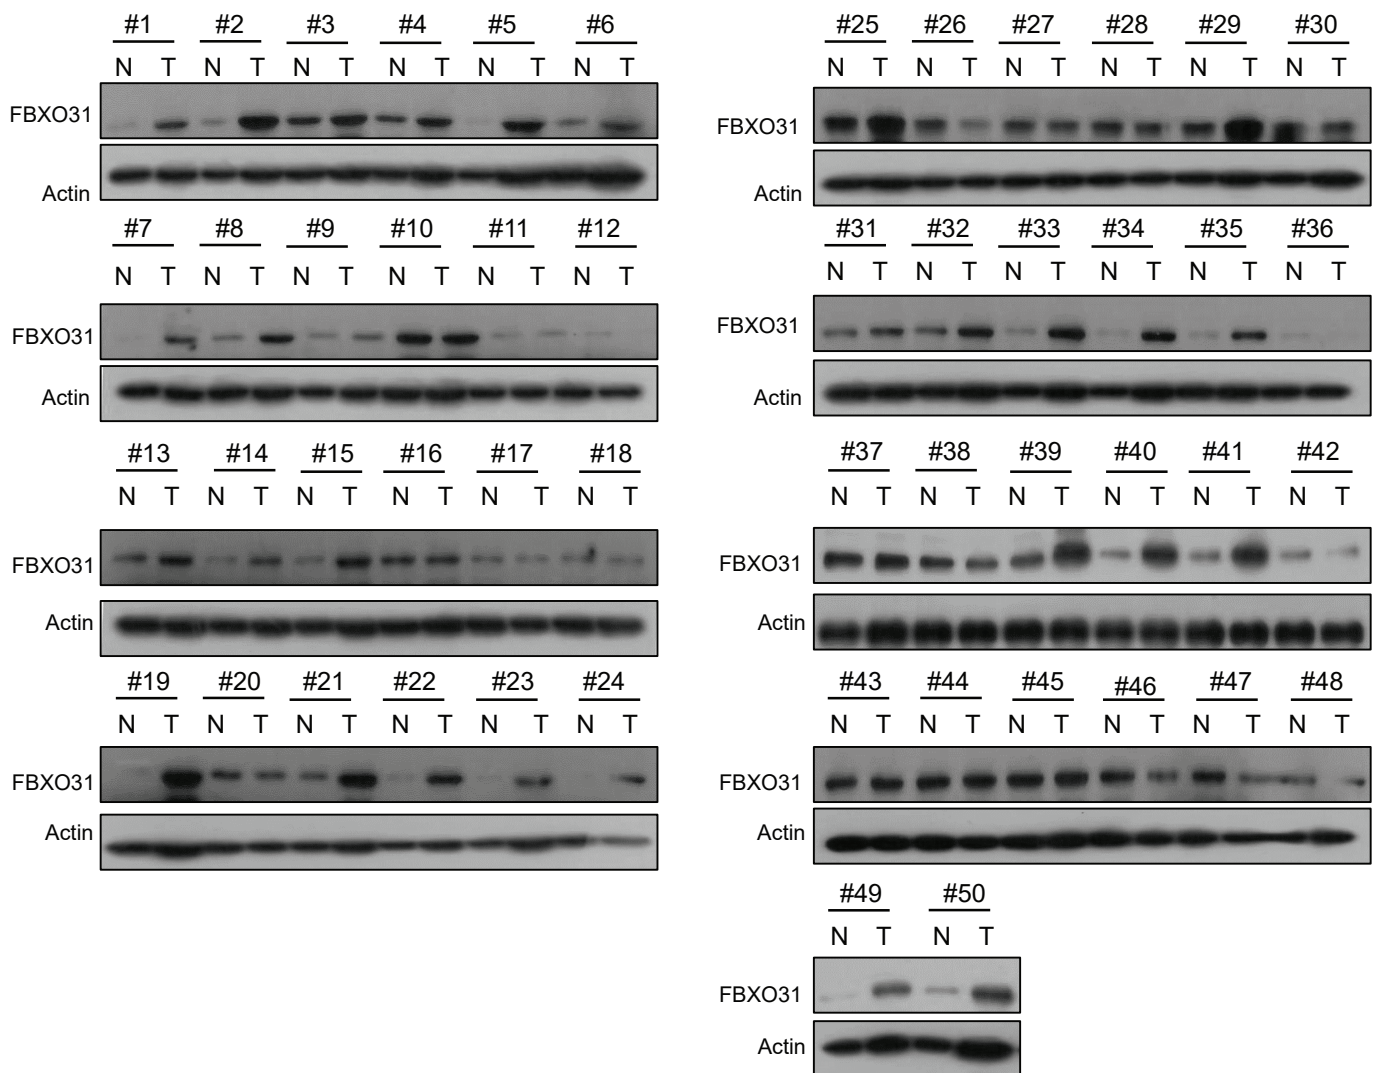

**Figure S7.** Western blot analysis of FBXO31 expression in 50 pairs of ESCC (T) and matched non-tumor (N) tissues.

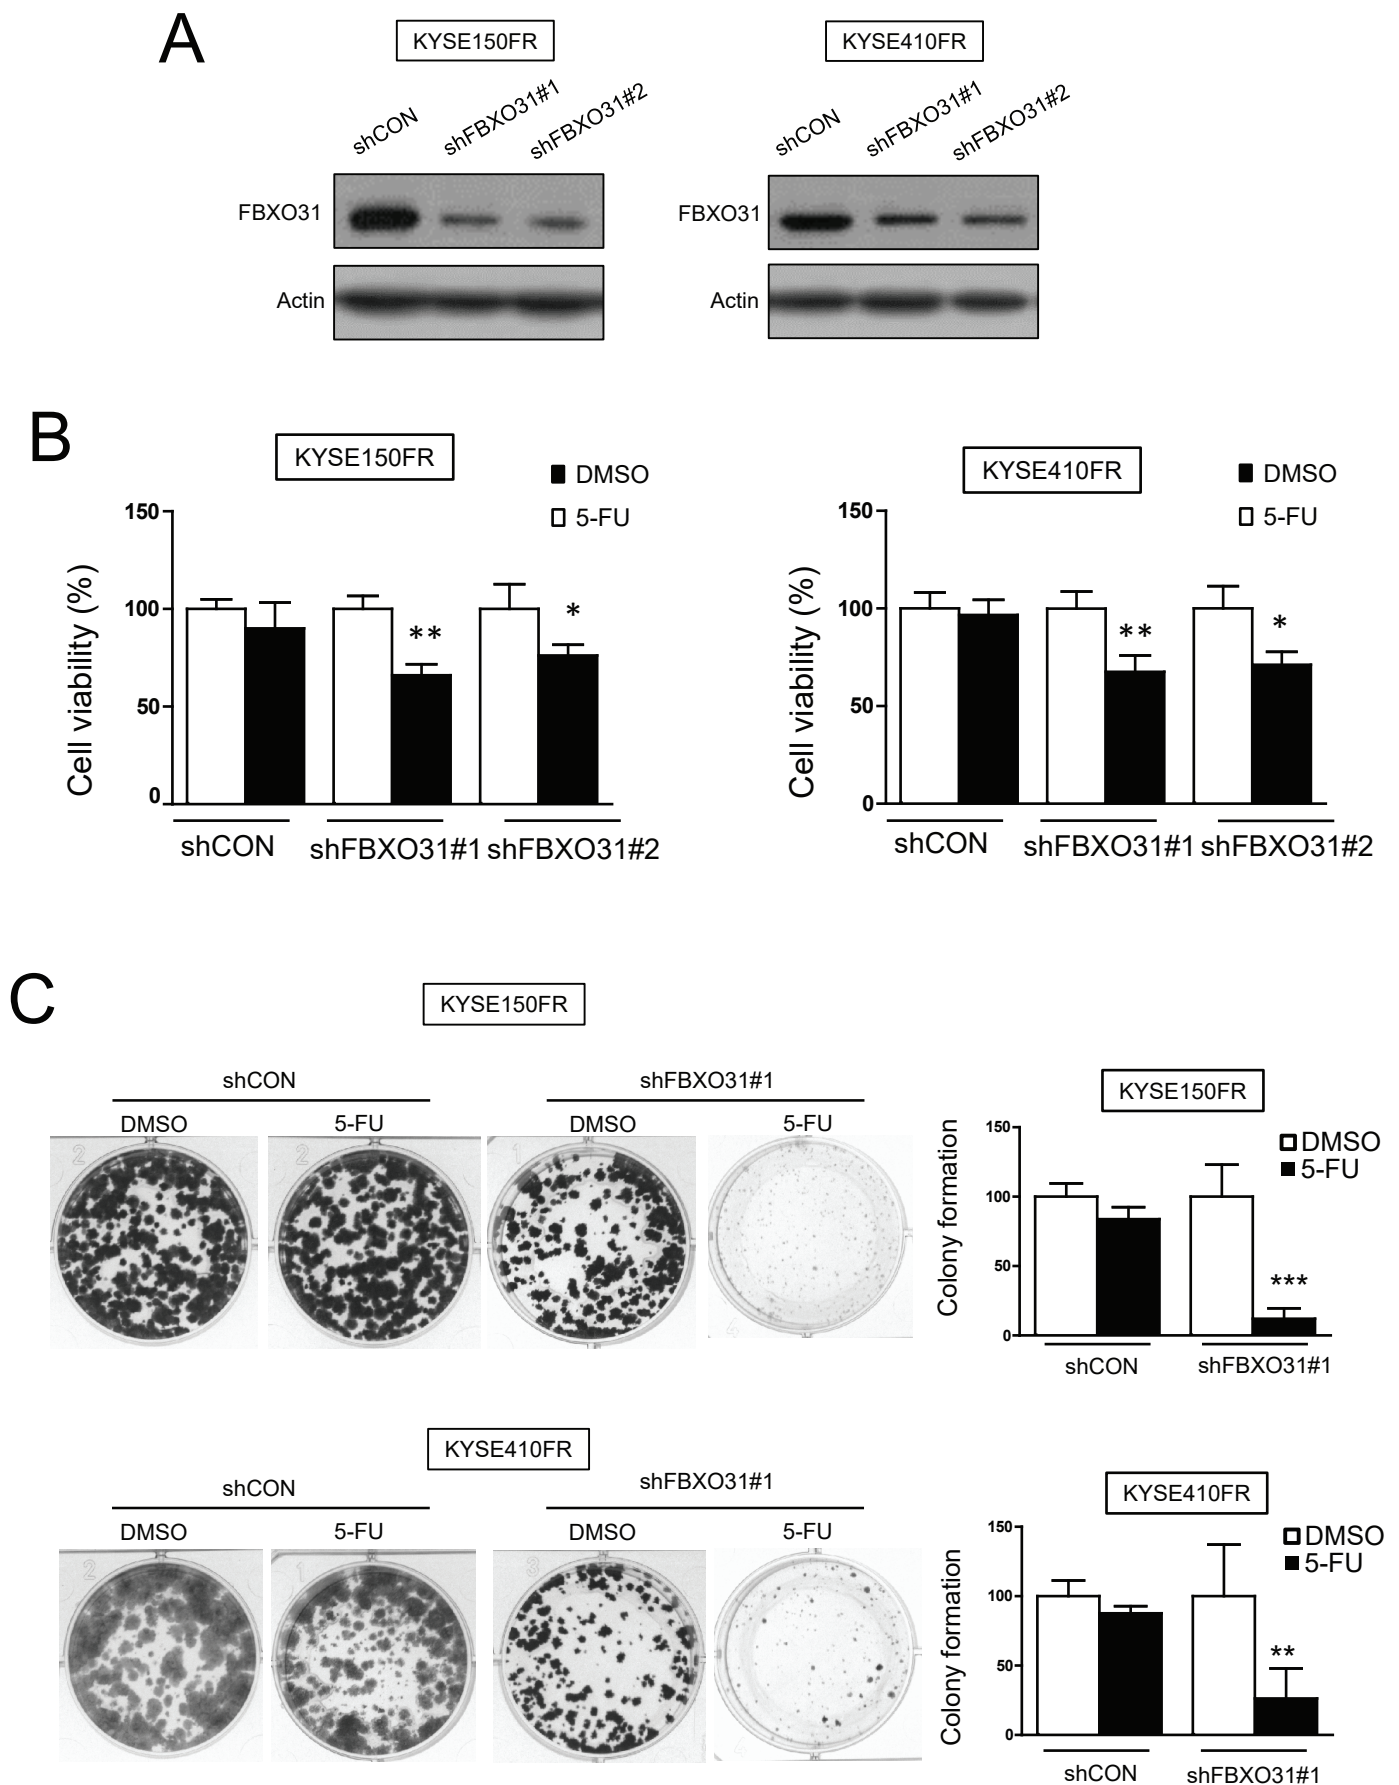

**Figure S8.** (A) The efficacy of FBXO31 knockdown and overexpression in FR cell lines. (B) MTT assay showing the effect of knockdown of FBXO31 on cell viability. (C) Colony formation assay showing the effect of knockdown of FBXO31 on 5-FU chemoresistance. Bars, SD; \*,  $P < 0.05$ ; \*\*,  $P < 0.01$ ; \*\*\*,  $P < 0.001$ .

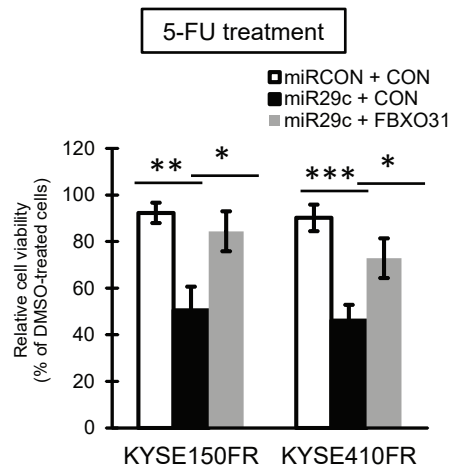

**Figure S9.** KYSE150FR and KYSE410FR cells with stable overexpression of miR-29c, co-overexpression of miR-29c and FBXO31, or control plasmids, were treated with 5-FU (20  $\mu$ M) or DMSO for 48 hours and then subjected to MTT assay.

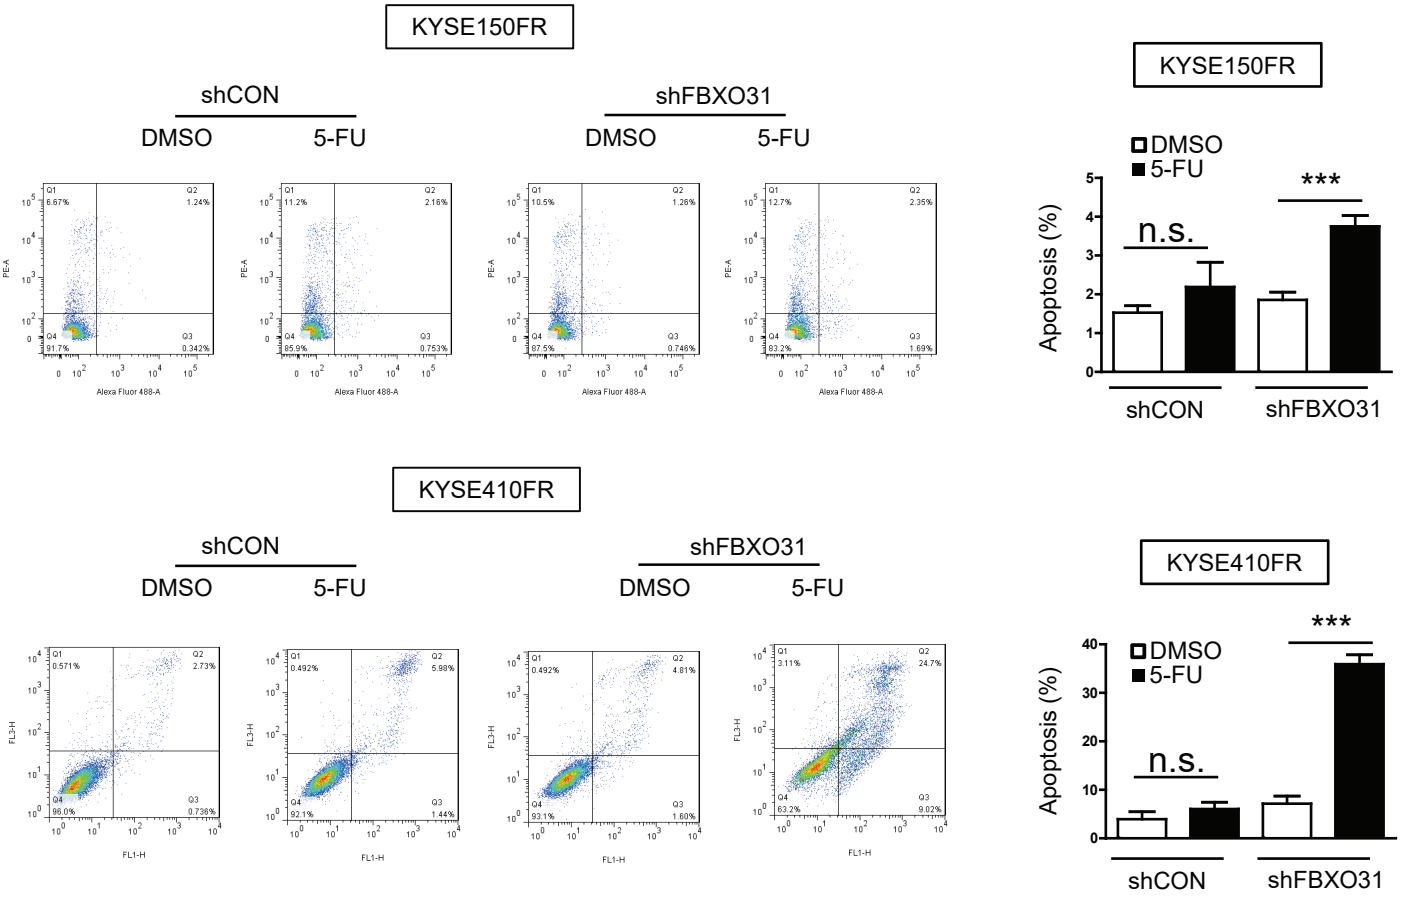

**Figure S10.** Flow cytometry analysis of effect of FBXO31-knockdown on 5-FU-induced apoptosis. Bars, SD; n.s., no significance; \*\*\*,  $P < 0.001$ .

A

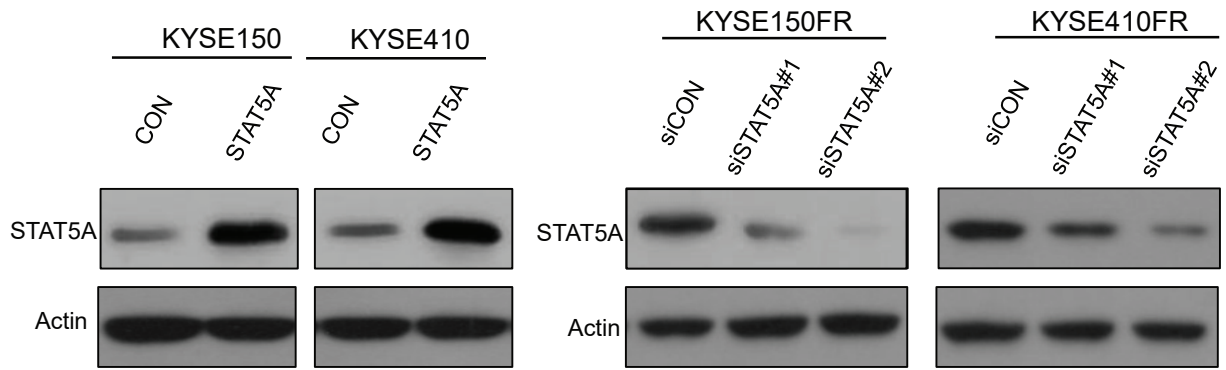

B

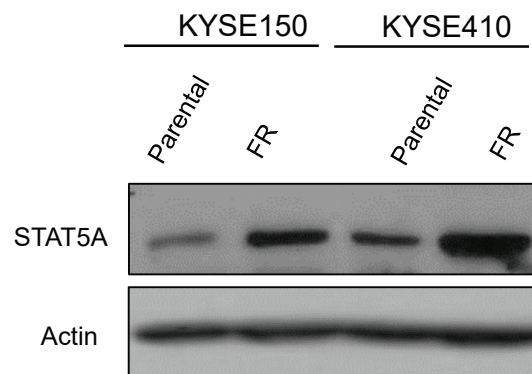

**Figure S11. (A)** Western blot showing the manipulation of STAT5A expression in ESCC cells. **(B)** The expression of STAT5A in parental cells and in 5-FU-chemoresistant cell lines.

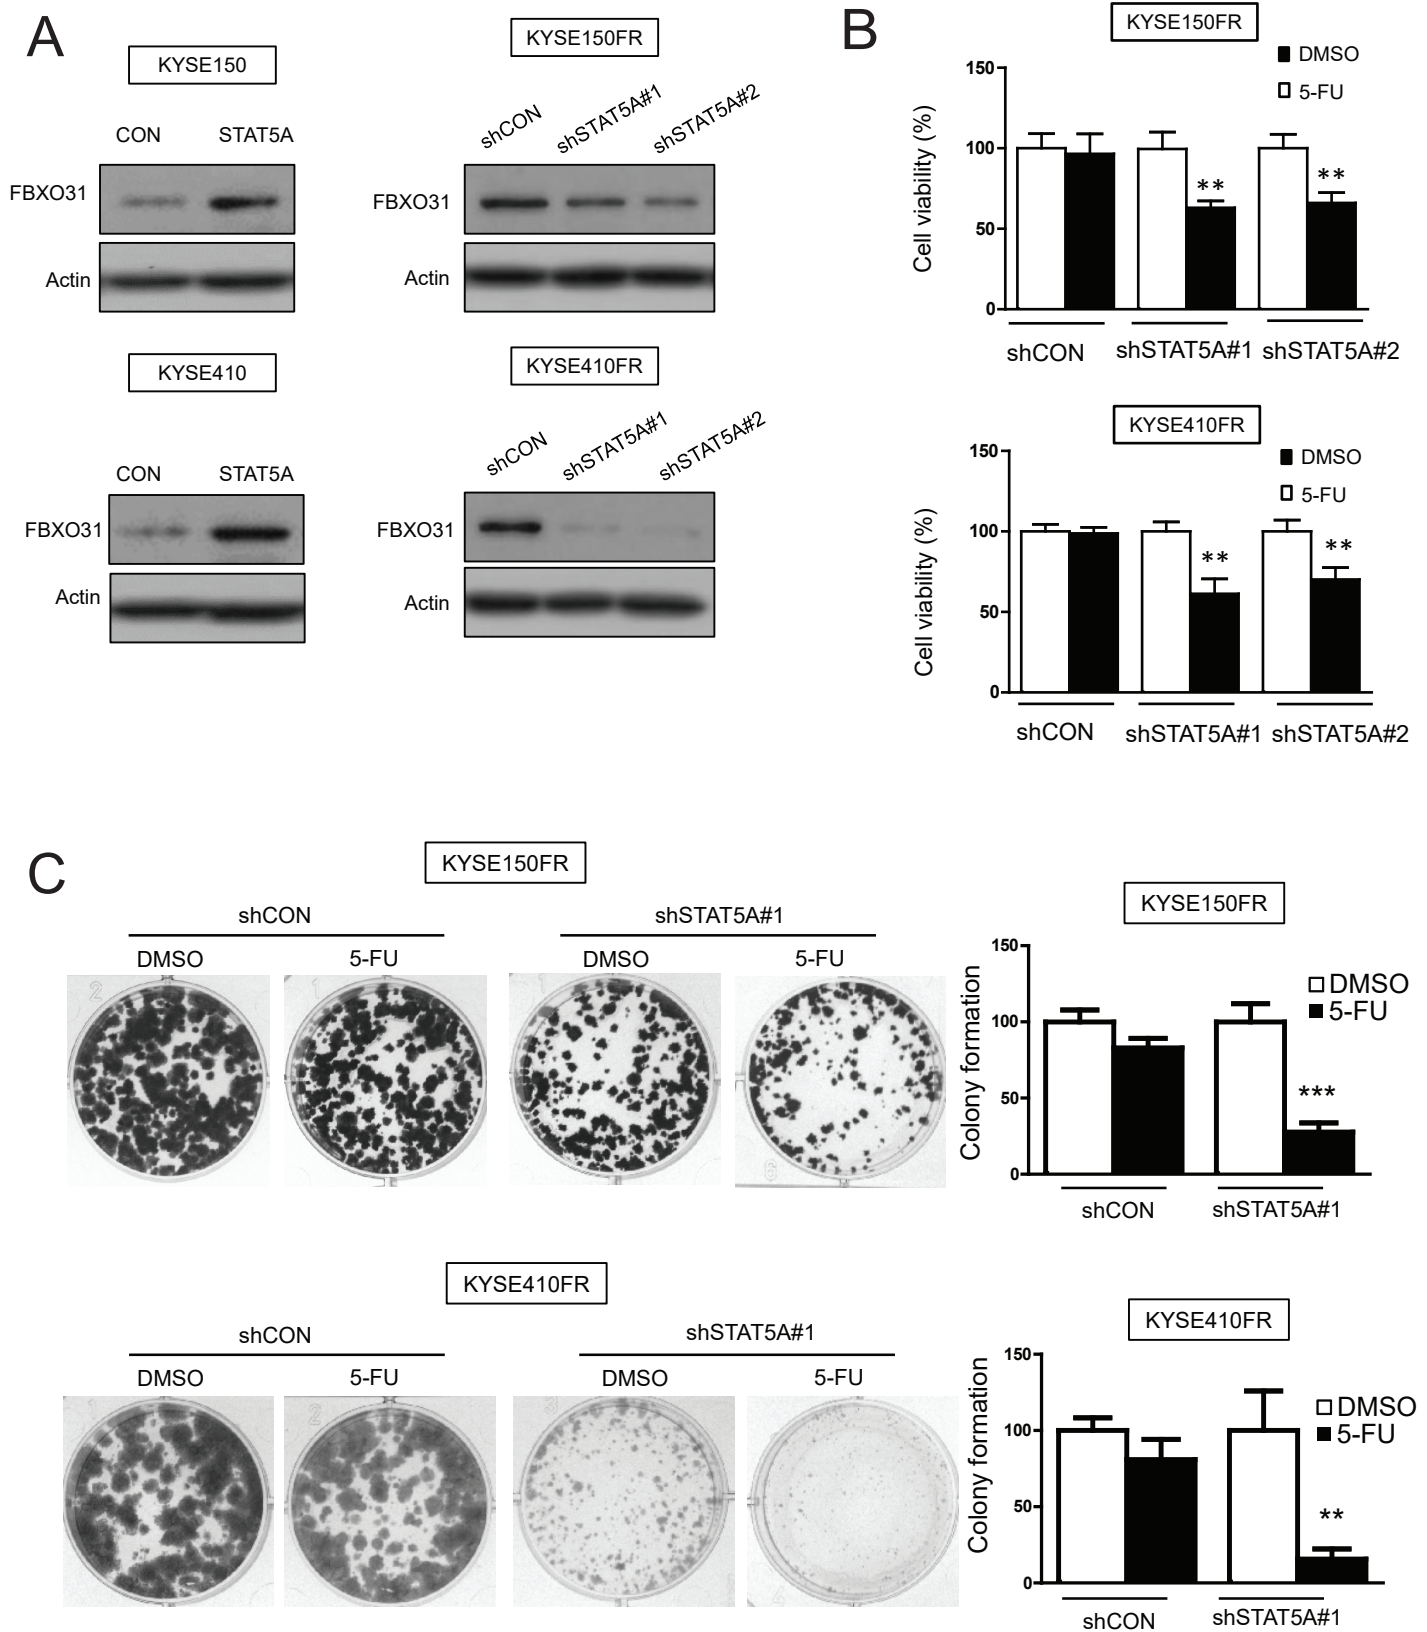

**Figure S12.** (A) Western blot showing the effect of manipulation of STAT5A expression on FBXO31. (B) Effect of knockdown of STAT5A on cell viability. (C) Effect of knockdown of STAT5A on 5-FU chemoresistance. Bars, SD; \*\*,  $P < 0.01$ ; \*\*\*,  $P < 0.001$ .



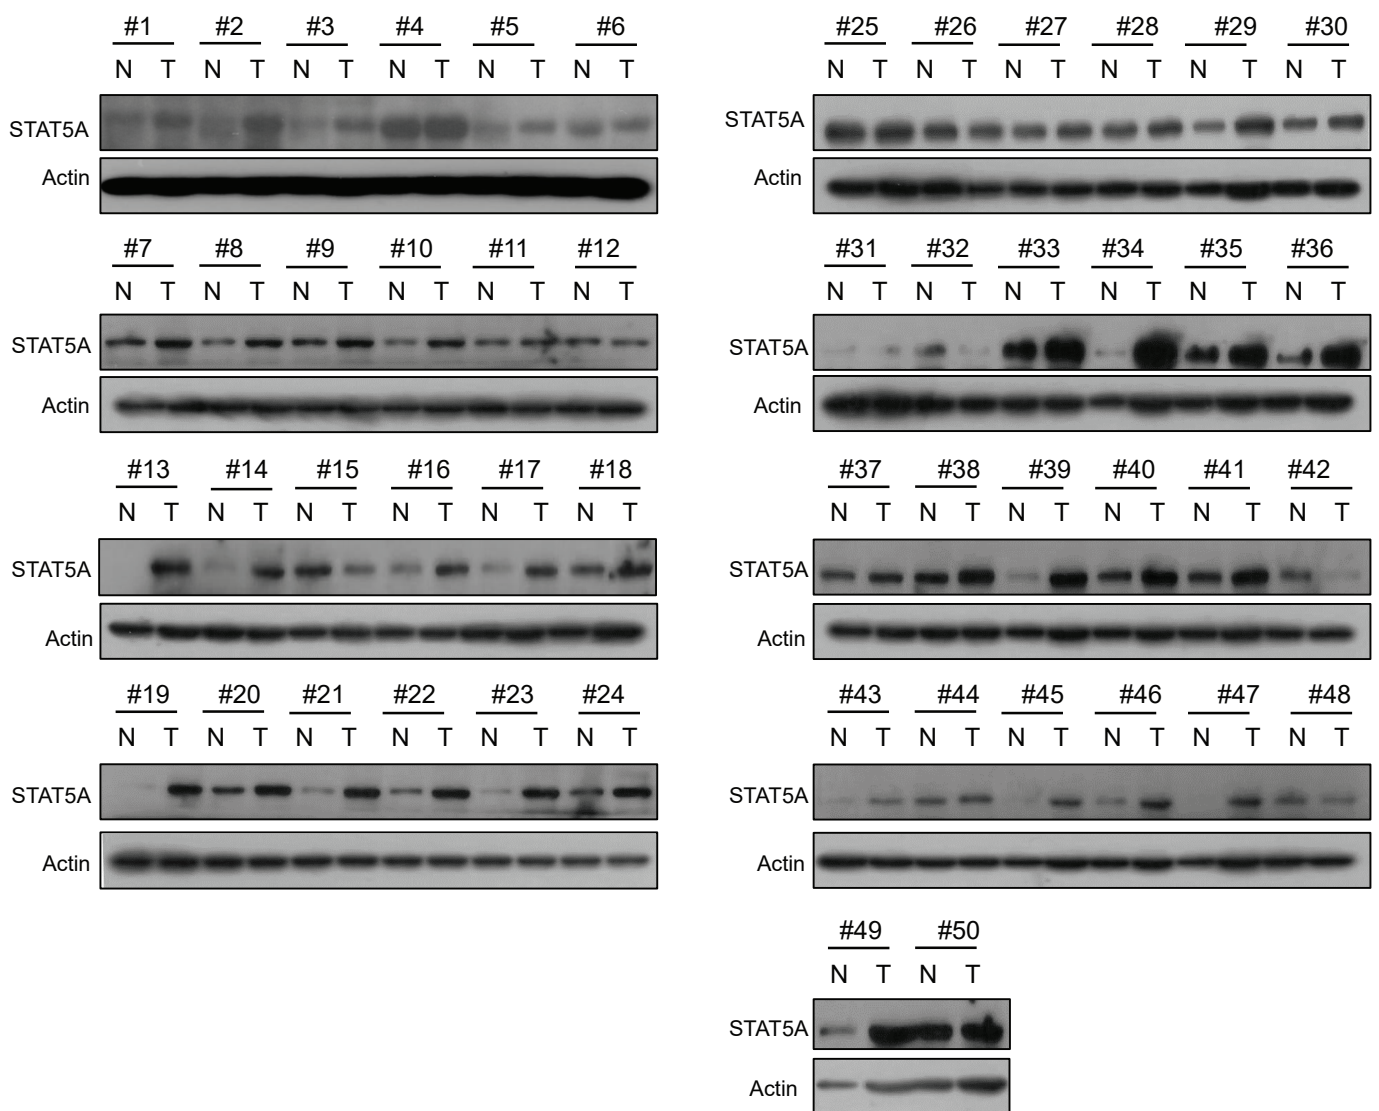

**Figure S13.** Expression level of STAT5A was determined in 50 pairs of ESCC (T) and matched non-tumor (N) tissues by Western blot.

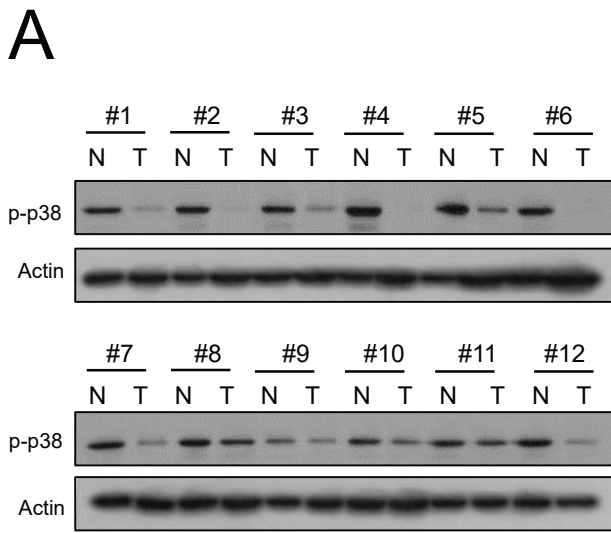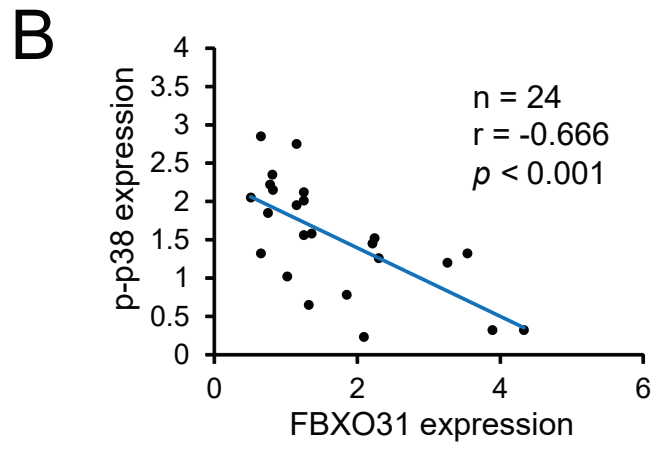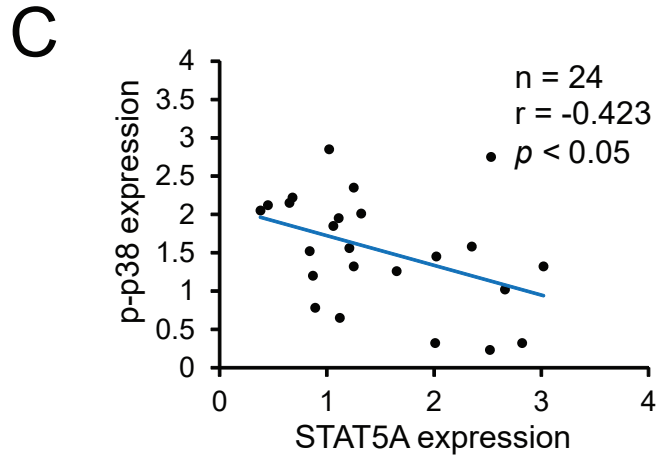

**Figure S14. (A)** Expression level of p-p38 was determined in 12 pairs of ESCC (T) and matched non-tumor (N) tissues by Western blot. **(B)** Inverse correlation between p-p38 and FBXO31 in clinical ESCC tissues. **(C)** Inverse correlation between p-p38 and STAT5A in clinical ESCC tissues.

Table S1. Forward primers for the 12 shortlisted miRNAs.

|    | miRNA      | Sequence                           |
|----|------------|------------------------------------|
| 1  | miR-30b    | 5'-CGCTGTAAACATCCTACACTCAGCTA-3'   |
| 2  | miR-526b   | 5'-GCTCTTGAGGGAAGCACTTTCTGT-3'     |
| 3  | miR-339-5p | 5'-CTGTCCTCCAGGAGCTCACGA-3'        |
| 4  | miR-532-5p | 5'-CATGCCTTGAGTGTAGGACCGTA-3'      |
| 5  | miR-26b    | 5'-GCGCTTCAAGTAATTCAGGATAGGT-3'    |
| 6  | miR-339-3p | 5'-CCTCGACGACAGAGCCGAAA-3'         |
| 7  | miR-374b   | 5'-CGCGCATATAATAACAACCTGCTAAGTG-3' |
| 8  | miR-708    | 5'-GAAGGAGCTTACAATCTAGCTGGGAA-3'   |
| 9  | miR-29c    | 5'-GCGTAGCACCATTTGAAATCGGTTA-3'    |
| 10 | miR-519a   | 5'-GCGAAAGTGCATCCTTTTAGAGTGT-3'    |
| 11 | miR-139-5p | 5'-TCTACAGTGCACGTGTCTCCAGT-3'      |
| 12 | miR-331-3p | 5'-CCCCTGGGCCTATCCTAGAA-3'         |

**Table S2.** Primers for site-directed mutagenesis of FBXO31 3'UTR and miR-29c promoter.

|                         | Primers | Sequence                                        |
|-------------------------|---------|-------------------------------------------------|
| <b>FBXO31 3'UTR</b>     | F       | 5'-GCAGGACCCTCCTGACTCGAGCTCTTCCTG-3'            |
|                         | R       | 5'-CAGGAAGAGCTCGAGTCAGGAGGGTCCTGC-3'            |
| <b>miR-29c promoter</b> |         |                                                 |
| Binding site 3-1        | F       | 5'-CCCTCTGTCTCTGTACACGAAATGCCTCTTCCTTCTTTCT-3'  |
|                         | R       | 5'-AGAAAGAAGGAAGAGGCATTCGTGTACAGAGACAGAGGG-3'   |
| Binding site 3-2        | F       | 5'-CCTCTGTCTCTGTACAGGTATAGCCTCTTCCTTCTTTCTTG-3' |
|                         | R       | 5'-CAAGAAAGAAGGAAGAGGCTATACCTGTACAGAGACAGAGG-3' |
| Binding site 3-3        | F       | 5'-CCCTCTGTCTCTGTACAGCATAAGCCTCTTCCTTCTTTCT-3'  |
|                         | R       | 5'-AGAAAGAAGGAAGAGGCTTATGCTGTACAGAGACAGAGGG-3'  |

**Table S3.** The top 100 downregulated miRNAs in KYSE150FR cells. <sup>^</sup>#

|    | Name                | Fold change | PMID of citations (Relevance based on literature search) |                          |
|----|---------------------|-------------|----------------------------------------------------------|--------------------------|
|    |                     |             | miRNA in cancer                                          | miRNA in chemoresistance |
| 1  | hsa-miR-106a        | 0.001       | 23121918, 23133552, 23178825                             |                          |
| 2  | hsa-miR-19b         | 0.001       | 20634878, 22731656                                       |                          |
| 3  | hsa-miR-20a         | 0.001       | 22731656, 22959509, 22904162                             |                          |
| 4  | hsa-miR-21          | 0.001       | 23133552, 20628822                                       |                          |
| 5  | hsa-miR-31          | 0.001       | 23121918, 23389368, 23230184                             |                          |
| 6  | hsa-miR-16          | 0.002       | 12434020, 22959509                                       |                          |
| 7  | hsa-miR-191         | 0.002       | 20634878, 22898264, 21956418                             |                          |
| 8  | hsa-miR-19a         | 0.002       | 22731656, 22677902                                       |                          |
| 9  | hsa-miR-93          | 0.002       | 23111389, 22964854                                       |                          |
| 10 | <b>hsa-miR-30b</b>  | 0.003       | 20634878, 20508945                                       |                          |
| 11 | hsa-miR-30c         | 0.003       | 20634878, 22042419                                       | 18823650                 |
| 12 | hsa-miR-320         | 0.003       | 23188675, 20508945, 19462682                             | 23188675                 |
| 13 | <b>hsa-miR-526b</b> | 0.003       |                                                          |                          |
| 14 | RNU48               | 0.004       | 22745731, 22643910                                       |                          |
| 15 | hsa-miR-126         | 0.004       | 23133552, 23389368                                       | 22934011                 |
| 16 | hsa-miR-200b        | 0.004       | 22904162, 23272653, 22964023                             | 22139708, 22795796       |
| 17 | hsa-miR-99a         | 0.004       | 20508945, 23173671, 22299047                             |                          |
| 18 | hsa-let-7e          | 0.005       | 20634878, 22970210                                       | 23167930, 18823650       |
| 19 | hsa-miR-205         | 0.005       | 22964023, 22618509                                       |                          |
| 20 | hsa-miR-221         | 0.005       | 16039986, 22964023, 22904162                             |                          |
| 21 | hsa-let-7g          | 0.006       | 20309945, 22862169, 22964023                             |                          |
| 22 | hsa-miR-26a         | 0.006       | 23226446, 23026055, 22885155                             |                          |
| 23 | hsa-let-7b          | 0.007       | 23029111, 23144930                                       | 19654291, 20881268       |
| 24 | hsa-miR-106b        | 0.007       | 23133552, 23028803                                       |                          |
| 25 | hsa-miR-135b        | 0.007       | 23328512, 23266581, 22868372                             |                          |
| 26 | hsa-miR-149         | 0.007       | 23144691, 21873783                                       | 22682234                 |
| 27 | hsa-miR-15b         | 0.007       | 22904162, 22908280, 22641662                             |                          |
| 28 | hsa-miR-27a         | 0.007       | 20634878, 23240057                                       |                          |
| 29 | hsa-miR-92a         | 0.007       | 23121918, 20634878, 22731656, 23052693, 23272653         |                          |
| 30 | hsa-miR-342-3p      | 0.011       | 23174013                                                 | 22112324                 |
| 31 | hsa-miR-429         | 0.012       | 23552699, 21897839                                       |                          |
| 32 | hsa-miR-454         | 0.012       | 20634878, 19022373                                       |                          |
| 33 | hsa-miR-186         | 0.013       | 20979053, 20878113, 20677554                             |                          |

|    |                       |       |                               |                    |
|----|-----------------------|-------|-------------------------------|--------------------|
| 34 | hsa-miR-492           | 0.013 | 22850566, 21319197, 18818933, |                    |
| 35 | hsa-miR-125b          | 0.014 | 20634878, 22898264            |                    |
| 36 | hsa-miR-22            | 0.014 | 20508945, 23140295            |                    |
| 37 | hsa-miR-29a           | 0.014 | 23133552, 20508945            |                    |
| 38 | <b>hsa-miR-339-5p</b> | 0.014 | 20932331                      |                    |
| 39 | <b>hsa-miR-532-5p</b> | 0.015 | 22925189                      |                    |
| 40 | hsa-miR-99b           | 0.015 | 22299047, 22969861            |                    |
| 41 | hsa-let-7a            | 0.016 | 16530703, 22972404, 22970210  | 22129484, 21292542 |
| 42 | hsa-miR-200a          | 0.016 | 23272653, 17875710, 22908280  |                    |
| 43 | hsa-miR-28-3p         | 0.017 | 22686440                      |                    |
| 44 | hsa-miR-590-5p        | 0.017 | 22684895                      |                    |
| 45 | hsa-miR-574-3p        | 0.018 | 22179486, 20815808            |                    |
| 46 | hsa-miR-141           | 0.019 | 22964023, 23266581            |                    |
| 47 | hsa-miR-222           | 0.019 | 22904162, 23389368, 22641662  |                    |
| 48 | hsa-let-7d            | 0.021 | 22929886, 22862169            |                    |
| 49 | hsa-miR-103           | 0.021 | 23266581, 22641662, 22908280  |                    |
| 50 | hsa-miR-140-5p        | 0.021 | 23098991, 21063788            |                    |
| 51 | <b>hsa-miR-26b</b>    | 0.021 | 22964023                      |                    |
| 52 | hsa-miR-365           | 0.023 | 22072615, 21737779, 18812439  |                    |
| 53 | hsa-miR-203           | 0.025 | 22952344, 22940702            | 21553120, 21354697 |
| 54 | hsa-miR-218           | 0.026 | 23159910, 22893786, 22860003  | 23443110           |
| 55 | hsa-miR-27b           | 0.026 | 23300597, 22902387            | 21899346,21899346  |
| 56 | hsa-miR-660           | 0.026 | 22610076, 19022373            |                    |
| 57 | hsa-miR-132           | 0.028 | 22929615, 22506400, 21329664  |                    |
| 58 | hsa-miR-25            | 0.028 | 23205084, 22450326, 22387599  |                    |
| 59 | <b>hsa-miR-339-3p</b> | 0.028 |                               |                    |
| 60 | hsa-miR-345           | 0.028 | 22307176                      | 20099276           |
| 61 | <b>hsa-miR-374b</b>   | 0.028 |                               |                    |
| 62 | hsa-miR-130a          | 0.029 | 22540308, 22455133, 20508945  |                    |
| 63 | hsa-miR-23a           | 0.029 | 23236401, 22628407            |                    |
| 64 | hsa-miR-210           | 0.039 | 23139634, 23148210            |                    |
| 65 | hsa-miR-18a           | 0.046 | 22865399, 22540308            |                    |
| 66 | hsa-miR-744           | 0.049 | 22432036, 21637912            |                    |
| 67 | hsa-miR-18b           | 0.052 | 23205106, 22964854, 22821209  |                    |
| 68 | hsa-miR-130b          | 0.053 | 22425712, 22187671            |                    |
| 69 | hsa-miR-598           | 0.053 | 22429812                      |                    |
| 70 | hsa-miR-146b-5p       | 0.054 | 23363792, 22719913, 22241525  |                    |
| 71 | hsa-miR-197           | 0.054 | 22027761, 21904633            | 21998738, 21560177 |
| 72 | hsa-miR-487a          | 0.054 | 20806854                      |                    |
| 73 | hsa-miR-425           | 0.055 | 18765229                      |                    |
| 74 | hsa-miR-532-3p        | 0.055 | 21535956                      |                    |
| 75 | hsa-miR-224           | 0.056 | 23095110, 22747440, 21864507  |                    |
| 76 | hsa-miR-196b          | 0.057 | 23133552, 22976466,21255435   |                    |

|     |                       |       |                              |                    |
|-----|-----------------------|-------|------------------------------|--------------------|
| 77  | hsa-miR-28-5p         | 0.057 | 22240480, 21199010           |                    |
| 78  | hsa-miR-324-5p        | 0.057 | 22202009, 21747943           |                    |
| 79  | hsa-miR-181a          | 0.058 | 23226446, 22971574           |                    |
| 80  | hsa-miR-148a          | 0.063 | 23056401, 22562546, 22496917 | 21796641           |
| 81  | hsa-miR-374a          | 0.067 | 23133552, 21563230, 21274007 |                    |
| 82  | hsa-miR-652           | 0.072 | 21789031, 21035526, 20508945 |                    |
| 83  | <b>hsa-miR-708</b>    | 0.073 | 23082062                     |                    |
| 84  | hsa-miR-484           | 0.083 | 22510686, 19849700           |                    |
| 85  | hsa-miR-100           | 0.087 | 23173870, 23151088, 22937028 | 22120675           |
| 86  | hsa-miR-29b           | 0.087 | 23000157, 22776000           | 17652184, 20564213 |
| 87  | hsa-miR-15a           | 0.09  | 23104180, 22629365           | 20839343           |
| 88  | hsa-miR-34a           | 0.098 | 23032974, 23085450           | 23085450, 18834855 |
| 89  | <b>hsa-miR-29c</b>    | 0.101 | 22664488                     |                    |
| 90  | hsa-miR-193b          | 0.106 | 22491710, 21803762, 20304954 |                    |
| 91  | hsa-miR-324-3p        | 0.107 | 22745731, 22298638           |                    |
| 92  | hsa-miR-125a-5p       | 0.11  | 22690848, 22540308           | 21399894           |
| 93  | hsa-let-7f            | 0.111 | 22929886, 22110251           |                    |
| 94  | hsa-miR-494           | 0.111 | 22544933, 22110251, 21809359 |                    |
| 95  | <b>hsa-miR-519a</b>   | 0.113 | 22672989                     |                    |
| 96  | <b>hsa-miR-139-5p</b> | 0.115 | 21304530                     |                    |
| 97  | <b>hsa-miR-331-3p</b> | 0.126 | 20510161, 19584056           |                    |
| 98  | hsa-miR-362-5p        | 0.145 | 21543894                     |                    |
| 99  | hsa-miR-23b           | 0.164 | 23300597, 22649212           | 21899346           |
| 100 | hsa-miR-515-3p        | 0.168 | 21244772, 22420006           |                    |

^ The 66 candidates removed in the 1<sup>st</sup> round selection are shaded in grey.

# The 12 shortlisted novel candidates are highlighted in blue.
